# Supplementary material for: Urine and Serum Electrolytes and Biochemical Values Associated with Osteoporosis in Premenopausal and Postmenopausal Women: A Longitudinal and Cross-Sectional Study Using Korean Genome and Epidemiology Study (KoGES) Cohort
Source: MDPI journal article supplement (doi:10.3390/jcm10102155), 2021-05-17
Supplement: s1 [file s1]

Table S1. The risk of osteoporosis according to serum calcium and urine uric acid in cubic spline analysis

| Variables                  | premenopausal participants |      |        | postmenopausal participants |      |       |
|----------------------------|----------------------------|------|--------|-----------------------------|------|-------|
|                            | OR                         | LCI  | UCI    | OR                          | LCI  | UCI   |
| serum calcium              |                            |      |        |                             |      |       |
| 8.5                        | 0.99                       | 0.17 | 5.74   | 1.27                        | 0.29 | 5.61  |
| 8.7                        | 0.99                       | 0.34 | 2.85   | 1.16                        | 0.48 | 2.81  |
| 8.9                        | 1                          | 0.7  | 1.42   | 1.05                        | 0.78 | 1.41  |
| 9                          | 1 (ref)                    | 1    | 1      | 1 (ref)                     | 1    | 1     |
| 9.1                        | 1                          | 0.71 | 1.43   | 0.95                        | 0.71 | 1.28  |
| 9.3                        | 1.01                       | 0.35 | 2.9    | 0.86                        | 0.36 | 2.1   |
| 9.5                        | 1.08                       | 0.21 | 5.65   | 0.79                        | 0.2  | 3.18  |
| 9.7                        | 1.38                       | 0.2  | 9.72   | 0.75                        | 0.15 | 3.8   |
| 9.9                        | 2.17                       | 0.31 | 15.17  | 0.74                        | 0.15 | 3.59  |
| 10.1                       | 3.69                       | 0.55 | 24.58  | 0.74                        | 0.17 | 3.32  |
| 10.3                       | 6.3                        | 0.9  | 43.98  | 0.75                        | 0.17 | 3.36  |
| 10.5                       | 10.76                      | 1.34 | 86.51  | 0.75                        | 0.15 | 3.75  |
| 10.7                       | 18.39                      | 1.84 | 183.86 | 0.75                        | 0.12 | 4.52  |
| 10.9                       | 31.43                      | 2.39 | 414.08 | 0.75                        | 0.1  | 5.78  |
| Urine uric acid/creatinine |                            |      |        |                             |      |       |
| 0                          | 0.11                       | 0    | 19.68  | 0.21                        | 0.01 | 3.33  |
| 0.1                        | 0.19                       | 0    | 9.27   | 0.31                        | 0.04 | 2.45  |
| 0.2                        | 0.33                       | 0.02 | 4.37   | 0.46                        | 0.12 | 1.81  |
| 0.3                        | 0.58                       | 0.16 | 2.06   | 0.68                        | 0.35 | 1.33  |
| 0.4                        | 1 (ref)                    | 1    | 1      | 1 (ref)                     | 1    | 1     |
| 0.5                        | 1.5                        | 0.67 | 3.39   | 1.44                        | 0.92 | 2.24  |
| 0.6                        | 1.75                       | 0.62 | 4.94   | 1.98                        | 1.12 | 3.49  |
| 0.7                        | 1.78                       | 0.4  | 8.03   | 2.67                        | 1.3  | 5.5   |
| 0.8                        | 1.8                        | 0.19 | 17.42  | 3.6                         | 1.31 | 9.94  |
| 0.9                        | 1.82                       | 0.08 | 41.43  | 4.86                        | 1.24 | 19.02 |
| 1                          | 1.84                       | 0.03 | 101.94 | 6.54                        | 1.15 | 37.25 |

Abbreviations: OR, odds ratio; LCI, lower bound of 95% confidence interval; UCI, upper bound of 95% confidence interval.

Table S2. The clinical variables according to bone density groups in cross-sectional cohort stratified by the menopausal status.

(A) Premenopausal women

| Variables                                | Normal bone density<br>n = 501 | Osteopenia<br>n = 342 | Osteoporosis<br>n =105 | p-Value |
|------------------------------------------|--------------------------------|-----------------------|------------------------|---------|
| Age, years                               | 43 [41–45]                     | 49 [44–60]            | 61 [55–65]             | <0.001  |
| Body mass index, kg/m <sup>2</sup>       | 23.9 [22.2–26.0]               | 25.0 [23.0–27.0]      | 25.7 [23.7–27.3]       | <0.001  |
| Waist-hip ratio, cm/cm                   | 0.83 [0.78–0.89]               | 0.86 [0.80–0.93]      | 0.89 [0.85–0.95]       | <0.001  |
| Hypertension, <i>n</i> (%)               | 30 (6.0%)                      | 53 (15.5%)            | 26 (24.8%)             | <0.001  |
| Diabetes mellitus, <i>n</i> (%)          | 17 (3.4%)                      | 26 (7.6%)             | 2 (1.9%)               | 0.007   |
| Myocardial infarction, <i>n</i> (%)      | 3 (0.6%)                       | 2 (0.6%)              | 1 (1.0%)               | 0.909   |
| Alcohol habit, <i>n</i> (%)              |                                |                       |                        | 0.001   |
| Never drinker                            | 331 (66.1%)                    | 246 (71.9%)           | 77 (73.3%)             |         |
| Ex-drinker                               | 12 (2.4%)                      | 10 (2.9%)             | 8 (7.6%)               |         |
| Current drinker                          | 148 (29.5%)                    | 77 (22.5%)            | 16 (15.2%)             |         |
| Smoking habit, <i>n</i> (%)              |                                |                       |                        | 0.626   |
| Never smoker                             | 468 (93.4%)                    | 311 (90.9%)           | 94 (89.5%)             |         |
| Ex-smoker                                | 3 (0.6%)                       | 2 (0.6%)              | 1 (1.0%)               |         |
| Current smoker                           | 12 (2.4%)                      | 13 (3.8%)             | 5 (4.8%)               |         |
| Serum albumin, g/dL                      | 4.1 [3.9–4.1]                  | 4.0 [3.9–4.1]         | 4.0 [3.9–4.1]          | 0.14    |
| Serum blood urea nitrogen, mg/dL         | 12.3 [10.3–14.6]               | 12.9 [11.0–15.5]      | 13.6 [11.7–16.6]       | <0.001  |
| Estimated GFR, mL/min/1.73m <sup>2</sup> | 104.2 [98.5–105.7]             | 97.9 [88.1–103.5]     | 91.9 [88.7–96.5]       | <0.001  |
| Serum and Urine electrolytes             |                                |                       |                        |         |
| Serum calcium (albumin corrected), mg/dL | 9.5 [9.3–9.7]                  | 9.6 [9.4–9.9]         | 9.7 [9.5–10.0]         | <0.001  |
| Serum sodium, mmol/L                     | 142 [140–143]                  | 142 [141–144]         | 143 [141–144]          | <0.001  |
| Urine calcium/creatinine, mg/mg          | 0.12 [0.08–0.17]               | 0.13[0.08–0.19]       | 0.16 [0.11–0.24]       | <0.001  |

|                                   |                  |                  |                  |        |
|-----------------------------------|------------------|------------------|------------------|--------|
| Urine sodium/creatinine, mmol/mg  | 1.51 [1.08–2.16] | 1.60 [1.11-2.33] | 1.95 [1.4-2.5]   | <0.001 |
| Urine uric acid/creatinine, mg/mg | 0.48 [0.40–0.58] | 0.51 [0.41-0.60] | 0.56 [0.47-0.68] | <0.001 |
| Urine protein/creatinine, mg/mg   | 0.06 [0.04–0.11] | 0.07 [0.04-0.13] | 0.08 [0.05-0.14] | <0.001 |

(B) Postmenopausal women

| Variables                                | Normal bone density<br>n = 312 | Osteopenia<br>n = 458 | Osteoporosis<br>n =306 | p-Value |
|------------------------------------------|--------------------------------|-----------------------|------------------------|---------|
| Age, years                               | 55 [52–61]                     | 61 [56-65]            | 61 [56-66]             | <0.001  |
| Body mass index, kg/m <sup>2</sup>       | 24.4 [22.6–26.7]               | 25.1 [23.1-27.2]      | 25.3 [22.9-28.0]       | 0.046   |
| Waist-hip ratio, cm/cm                   | 0.89 [0.83–0.94]               | 0.92 [0.87-0.97]      | 0.92 [0.87-0.98]       | <0.001  |
| Hypertension, <i>n</i> (%)               | 59 (18.9%)                     | 119 (26.0%)           | 75 (24.5%)             | 0.065   |
| Diabetes mellitus, <i>n</i> (%)          | 23 (7.4%)                      | 50 (10.9%)            | 17 (5.6%)              | 0.023   |
| Myocardial infarction, <i>n</i> (%)      | 5 (1.6%)                       | 3 (0.7%)              | 3 (1.0%)               | 0.439   |
| Alcohol habit, <i>n</i> (%)              |                                |                       |                        | 0.559   |
| Never drinker                            | 237 (76.0%)                    | 349 (76.2%)           | 238 (77.8%)            |         |
| Ex-drinker                               | 7 (2.2%)                       | 16 (3.5%)             | 6 (2.0%)               |         |
| Current drinker                          | 65 (20.8%)                     | 81 (17.7%)            | 56 (18.3%)             |         |
| Smoking habit, <i>n</i> (%)              |                                |                       |                        | 0.121   |
| Never smoker                             | 296 (94.9%)                    | 411 (89.7%)           | 278 (90.8%)            |         |
| Ex-smoker                                | 1 (0.3%)                       | 9 (2.0%)              | 1 (0.3%)               |         |
| Current smoker                           | 13 (4.2%)                      | 20 (4.4%)             | 14 (4.6%)              |         |
| Serum albumin, g/dL                      | 4.1 [3.9–4.1]                  | 4.1 [3.9–4.1]         | 4.1 [3.9–4.1]          | 0.764   |
| Serum blood urea nitrogen, mg/dL         | 13.7 [11.6–16.1]               | 14.1 [12.0-16.3]      | 13.9 [11.7-16.8]       | 0.339   |
| Estimated GFR, mL/min/1.73m <sup>2</sup> | 93.8 [83.3–97.9]               | 90.6 [81.0-94.5]      | 91.2 [87.5-95.1]       | <0.001  |
| Serum and Urine electrolytes             |                                |                       |                        |         |

|                                          |                  |                  |                  |       |
|------------------------------------------|------------------|------------------|------------------|-------|
| Serum calcium (albumin corrected), mg/dL | 9.7 [9.5–9.9]    | 9.7 [9.6-9.9]    | 9.7 [9.5-9.9]    | 0.449 |
| Serum sodium, mmol/L                     | 143 [141–144]    | 143 [142–144]    | 143 [141–144]    | 0.347 |
| Urine calcium/creatinine, mg/mg          | 0.14 [0.09–0.20] | 0.14 [0.90-0.22] | 0.14 [0.09-0.21] | 0.656 |
| Urine sodium/creatinine, mmol/mg         | 1.93 [1.30–2.60] | 1.86 [1.32-2.60] | 1.92 [1.27-2.73] | 0.986 |
| Urine uric acid/creatinine, mg/mg        | 0.52 [0.43–0.62] | 0.53 [0.46-0.63] | 0.57 [0.45-0.65] | 0.014 |
| Urine protein/creatinine, mg/mg          | 0.08 [0.05–0.14] | 0.08 [0.05-0.13] | 0.09 [0.05-0.15] | 0.426 |

---

Abbreviations: GFR, glomerular filtration rate.
